# Supplementary material for: MPG and NPRL3 Polymorphisms Are Associated with Ischemic Stroke Susceptibility and Post-Stroke Mortality
Source: MDPI journal article supplement (doi:10.3390/diagnostics10110947), 2020-11-13
Supplement: s1 [file s1]

**Table S1.** Information of *NPRL3*, *MPG* polymorphisms for PCR-RFLP and real-time PCR analysis

| Gene         | rs number  | CHR  | Position | Primer sequence                                                                                | Probe sequence                                                                                           | Annealing temperature | Restriction enzyme |
|--------------|------------|------|----------|------------------------------------------------------------------------------------------------|----------------------------------------------------------------------------------------------------------|-----------------------|--------------------|
| <i>NPRL3</i> | rs2541618  | ch16 | 142825   | F: 5'- TCC AGG CTG GCT CTT CTA ATC<br>CAC -3'<br>R: 5'- TGA GAT GGG AAC TGG TGG GAG<br>AAC -3' |                                                                                                          | 58°C                  | <i>Sau96 I</i>     |
| <i>NPRL3</i> | rs75187722 | ch16 | 180529   | F: 5'- ATC TGG GTG AAT AGG AGG GTG<br>GGG -3'<br>R: 5'- AAC CCT CCT GTG TGT GGA AGG<br>ACC -3' |                                                                                                          | 60°C                  | <i>HphI</i>        |
| <i>MPG</i>   | rs2562162  | ch16 | 128179   |                                                                                                | Oligo 5'- TCA CTG CCC CCC CTC TCC CGG<br>CTT C -3'<br>Oligo 5' -TCA CTG CCC CCC TTC TCC CGG<br>CTT C -3' | 66°C                  |                    |
| <i>MPG</i>   | rs710079   | ch16 | 129223   | F: 5' - ATC TGC TCC CCA GGT CAT GCA<br>G – 3'<br>R: 5' - GGG TGA CCA TCC TGT GGG TTG<br>T – 3' |                                                                                                          | 60°C                  | <i>BccI</i>        |

Note: PCR-RFLP, polymorphism chain reaction-restriction fragment length polymorphism; CHR, chromosome.

**Table S2.** Information of *NPRL3*, *MPG* gene polymorphisms from WES results

| Gene  | Location                               | Rs number              | P-value    |
|-------|----------------------------------------|------------------------|------------|
| MPG   | 5_prime_UTR                            | rs76079375             | >0.05      |
| MPG   | 5_prime_UTR                            | rs2562162              | 0.00007259 |
| MPG   | 5_prime_UTR                            | .                      | >0.05      |
| MPG   | 5_prime_UTR                            | .                      | >0.05      |
| MPG   | 5_prime_UTR                            | rs710079               | >0.05      |
| MPG   | 5_prime_UTR                            | rs3176380;rs2234890    | >0.05      |
| MPG   | 5_prime_UTR                            | rs710080               | >0.05      |
| MPG   | synonymous                             | rs710081               | >0.05      |
| MPG   | missense                               | rs201536549            | >0.05      |
| MPG   | intron                                 | .                      | >0.05      |
| NPRL3 | intron                                 | rs743725               | 0.0002432  |
| NPRL3 | frameshift                             | rs57321480;rs397815833 | >0.05      |
| NPRL3 | intron                                 | rs559166204            | >0.05      |
| NPRL3 | intron                                 | rs2541618              | 0.0000468  |
| NPRL3 | intron                                 | rs2541616              | >0.05      |
| NPRL3 | intron                                 | rs808892               | 0.0003943  |
| NPRL3 | intron                                 | rs369659219            | >0.05      |
| NPRL3 | intron                                 | rs116993855            | >0.05      |
| NPRL3 | intron                                 | rs148796095            | >0.05      |
| NPRL3 | intron                                 | .                      | >0.05      |
| NPRL3 | intron                                 | rs138059300            | >0.05      |
| NPRL3 | splice_region & intron                 | rs61016911             | >0.05      |
| NPRL3 | synonymous                             | rs75187722             | 0.01976    |
| NPRL3 | splice_acceptor & 5_prime_UTR & intron | .                      | >0.05      |

Note: NPRL3, nitrogen permease receptor like-3; MPG, N-methylpurine DNA glycosylase.

**Table S3.** Comparison of baseline characteristics between ischemic stroke patients, ischemic stroke subgroups, and controls

| Characteristic                      | Controls<br>(n=417) | Stroke patients<br>(n=519) | <i>P</i> <sup>a</sup>          | LAD patients<br>(n=207) | <i>P</i> <sup>a</sup>          | SVD patients<br>(n=149) | <i>P</i> <sup>a</sup>          | CE patients<br>(n=53) | <i>P</i> <sup>a</sup>    |
|-------------------------------------|---------------------|----------------------------|--------------------------------|-------------------------|--------------------------------|-------------------------|--------------------------------|-----------------------|--------------------------|
| BMI (kg/m <sup>2</sup> , mean ±SD)  | 24.37±3.22          | 24.18±3.11                 | 0.439                          | 24.39±3.07              | 0.931                          | 23.98±3.16              | 0.253                          | 23.84±3.27            | 0.290                    |
| HDL-C (mg/dl, mean ±SD)             | 46.39±13.67         | 44.58±15.62                | <b>0.021<sup>b</sup></b>       | 43.52±13.26             | <b>0.039</b>                   | 44.03±13.77             | 0.127                          | 46.33±13.76           | 0.975                    |
| Homocysteine (μmol/L, mean ±SD)     | 10.07±4.18          | 11.21±7.34                 | <b>0.005<sup>b</sup></b>       | 11.40±7.95              | <b>0.047<sup>b</sup></b>       | 10.89±5.67              | 0.085 <sup>b</sup>             | 9.44±3.75             | 0.294                    |
| Folate (nmol/L, mean±SD)            | 8.83±7.92           | 7.10±6.15                  | <b>&lt; 0.0001<sup>b</sup></b> | 6.40±4.21               | <b>&lt; 0.0001<sup>b</sup></b> | 7.07±5.53               | <b>&lt; 0.0001<sup>b</sup></b> | 9.73±11.53            | 0.309 <sup>b</sup>       |
| Vitamin B12 (pg/ml, mean ±SD)       | 741.34±662.85       | 752.10±641.72              | 0.803                          | 794.03±872.81           | 0.935 <sup>b</sup>             | 657.32±314.81           | 0.148 <sup>b</sup>             | 813.58±433.98         | <b>0.013<sup>b</sup></b> |
| Total cholesterol (mg/dl, mean ±SD) | 193.12±36.99        | 190.33±40.40               | 0.280                          | 193.21±46.28            | 0.682 <sup>b</sup>             | 189.32±36.23            | 0.283                          | 180.25±34.59          | <b>0.017</b>             |
| Triglyceride (mg/dl, mean ±SD)      | 146.69±89.81        | 152.82±114.81              | 0.761 <sup>b</sup>             | 152.10±100.27           | 0.500                          | 169.29±125.53           | 0.099 <sup>b</sup>             | 134.02±181.59         | <b>0.007<sup>b</sup></b> |
| PLT (10 <sup>3</sup> /μℓ, mean ±SD) | 242.70±67.84        | 244.71±76.82               | 0.509 <sup>b</sup>             | 251.65±84.05            | 0.802 <sup>b</sup>             | 239.11±70.40            | 0.584                          | 233.34±74.61          | 0.351                    |
| PT (sec, mean ±SD)                  | 11.78±0.80          | 11.82±1.04                 | 0.793 <sup>b</sup>             | 11.78±0.76              | 1.000                          | 11.68±0.79              | 0.199                          | 12.07±1.05            | 0.099 <sup>b</sup>       |
| aPTT (sec, mean ±SD)                | 33.39±18.51         | 30.57±4.78                 | <b>0.043<sup>b</sup></b>       | 30.49±4.82              | 0.052 <sup>b</sup>             | 30.82±4.70              | 0.273 <sup>b</sup>             | 30.80±4.27            | 0.760 <sup>b</sup>       |
| Fibrinogen (mg/dl, mean ±SD)        | 402.27±126.70       | 425.30±127.15              | 0.054                          | 431.97±128.17           | 0.224                          | 398.40±115.24           | 0.780 <sup>b</sup>             | 453.96±133.29         | 0.086                    |
| Antithrombin III (% , mean ±SD)     | 94.16±43.02         | 93.95±17.39                | 0.078 <sup>b</sup>             | 94.82±15.54             | 0.056 <sup>b</sup>             | 95.45±20.05             | <b>0.045<sup>b</sup></b>       | 86.28±17.23           | 0.130 <sup>b</sup>       |
| BUN (mg/dl, mean ±SD)               | 15.81±5.00          | 16.14±6.39                 | 0.920 <sup>b</sup>             | 15.41±4.85              | 0.348                          | 15.08±5.14              | 0.135                          | 18.68±11.04           | 0.068 <sup>b</sup>       |
| Uric Acid (mg/dl, mean ±SD)         | 4.64±1.47           | 4.70±1.52                  | 0.561                          | 4.67±1.42               | 0.811                          | 4.62±1.36               | 0.905                          | 4.54±1.56             | 0.644                    |

Note: SD, standard deviation; BMI, body mass index; HDL-C, high density lipoprotein cholesterol; PLT, platelet; PT, prothrombin time; aPTT, activated partial thromboplastin time; BUN, blood urea nitrogen; LAD, large artery disease; SVD, small vessel disease; CE, cardioembolism.

<sup>a</sup> *P*-values were calculated by two-sided t-test for continuous variables and chi-square test for categorical variables.

<sup>b</sup> *P*-values were calculated by Mann-Whitney-test for continuous variables.

***P*-values< 0,05 are bold**

**Table S4.** Stratified analysis of *NPRL3* genotypes and characteristics of ischemic stroke among individual risk factors

| Characteristics          | <i>NPRL3</i> rs2541618       |              | <i>NPRL3</i> rs2541618       |              | <i>NPRL3</i> rs75187722      |               | <i>NPRL3</i> rs75187722      |               |
|--------------------------|------------------------------|--------------|------------------------------|--------------|------------------------------|---------------|------------------------------|---------------|
|                          | TT                           |              | CT+TT                        |              | GA                           |               | GA+AA                        |               |
|                          | AOR(95% CI)*                 | <i>P</i>     | AOR(95% CI)*                 | <i>P</i>     | AOR(95% CI)*                 | <i>P</i>      | AOR(95% CI)*                 | <i>P</i>      |
| Age (936)                |                              |              |                              |              |                              |               |                              |               |
| <63                      | 1.757 (0.853 - 3.620)        | 0.126        | 1.436 (0.951 - 2.167)        | 0.085        | 0.605 (0.350 - 1.044)        | 0.071         | 0.589 (0.343 - 1.014)        | 0.056         |
| ≥63                      | 1.412 (0.710 - 2.810)        | 0.325        | 1.048 (0.723 - 1.519)        | 0.805        | 0.762 (0.468 - 1.241)        | 0.275         | 0.794 (0.493 - 1.281)        | 0.345         |
| Sex (936)                |                              |              |                              |              |                              |               |                              |               |
| Male                     | 1.858 (0.913 - 3.782)        | 0.088        | <b>1.581 (1.033 - 2.421)</b> | <b>0.035</b> | <b>0.544 (0.310 - 0.957)</b> | <b>0.035</b>  | <b>0.544 (0.310 - 0.957)</b> | <b>0.035</b>  |
| Female                   | 1.339 (0.673 - 2.667)        | 0.406        | 1.012 (0.708 - 1.448)        | 0.947        | 0.815 (0.504 - 1.318)        | 0.404         | 0.825 (0.517 - 1.316)        | 0.419         |
| Hypertension (936)       |                              |              |                              |              |                              |               |                              |               |
| No                       | 1.169 (0.586 - 2.333)        | 0.657        | 1.060 (0.714 - 1.574)        | 0.773        | 0.993 (0.598 - 1.650)        | 0.978         | 0.993 (0.598 - 1.650)        | 0.978         |
| Yes                      | <b>2.109 (1.005 - 4.427)</b> | <b>0.049</b> | 1.375 (0.944 - 2.002)        | 0.097        | <b>0.529 (0.321 - 0.872)</b> | <b>0.012</b>  | <b>0.550 (0.339 - 0.893)</b> | <b>0.016</b>  |
| Diabetes mellitus (936)  |                              |              |                              |              |                              |               |                              |               |
| No                       | 1.403 (0.824 - 2.392)        | 0.213        | 1.154 (0.853 - 1.561)        | 0.353        | 0.685 (0.454 - 1.033)        | 0.071         | 0.681 (0.454 - 1.020)        | 0.062         |
| Yes                      | 2.782 (0.702 - 11.017)       | 0.145        | 1.651 (0.863 - 3.160)        | 0.130        | 0.766 (0.349 - 1.683)        | 0.507         | 0.838 (0.385 - 1.822)        | 0.656         |
| Hyperlipidemia (936)     |                              |              |                              |              |                              |               |                              |               |
| No                       | 1.378 (0.805 - 2.361)        | 0.242        | 1.180 (0.862 - 1.616)        | 0.301        | <b>0.599 (0.394 - 0.909)</b> | <b>0.016</b>  | <b>0.594 (0.394 - 0.897)</b> | <b>0.013</b>  |
| Yes                      | 3.132 (0.786 - 12.479)       | 0.106        | 1.367 (0.791 - 2.362)        | 0.262        | 1.233 (0.574 - 2.651)        | 0.591         | 1.318 (0.619 - 2.805)        | 0.474         |
| Smoking (930)            |                              |              |                              |              |                              |               |                              |               |
| No                       | 1.771 (0.918 - 3.415)        | 0.088        | 1.225 (0.873 - 1.719)        | 0.241        | 0.775 (0.495 - 1.216)        | 0.268         | 0.767 (0.493 - 1.193)        | 0.240         |
| Yes                      | 1.504 (0.707 - 3.200)        | 0.289        | 1.181 (0.745 - 1.871)        | 0.479        | <b>0.535 (0.287 - 0.998)</b> | <b>0.049</b>  | 0.568 (0.307 - 1.052)        | 0.072         |
| HDL-c (671)              |                              |              |                              |              |                              |               |                              |               |
| ≥40(M)/50(F)             | 1.083 (0.445 - 2.634)        | 0.860        | 0.945 (0.570 - 1.568)        | 0.827        | 0.510 (0.238 - 1.094)        | 0.084         | 0.510 (0.238 - 1.094)        | 0.084         |
| <40(M)/50(F)             | 1.354 (0.556 - 3.295)        | 0.504        | 1.453 (0.877 - 2.405)        | 0.147        | 0.589 (0.324 - 1.070)        | 0.082         | 0.623 (0.345 - 1.127)        | 0.118         |
| Folate * (927)           |                              |              |                              |              |                              |               |                              |               |
| >3.54 nmol/L             | 1.387 (0.808 - 2.381)        | 0.235        | 1.176 (0.874 - 1.582)        | 0.285        | 0.917 (0.618 - 1.359)        | 0.665         | 0.910 (0.617 - 1.341)        | 0.633         |
| ≤3.54 nmol/L             | 2.949 (0.580 - 15.003)       | 0.193        | 1.408 (0.613 - 3.237)        | 0.420        | <b>0.137 (0.048 - 0.386)</b> | <b>0.0002</b> | <b>0.142 (0.051 - 0.399)</b> | <b>0.0002</b> |
| Homocysteine † (931)     |                              |              |                              |              |                              |               |                              |               |
| <13.7 μmol/L             | 1.546 (0.917 - 2.605)        | 0.102        | 1.257 (0.936 - 1.687)        | 0.128        | 0.736 (0.493 - 1.098)        | 0.133         | 0.737 (0.497 - 1.093)        | 0.129         |
| ≥13.7 μmol/L             | 1.454 (0.295 - 7.171)        | 0.646        | 0.930 (0.432 - 2.001)        | 0.852        | 0.537 (0.217 - 1.329)        | 0.179         | 0.578 (0.237 - 1.411)        | 0.229         |
| Platelet † (927)         |                              |              |                              |              |                              |               |                              |               |
| <305 10 <sup>3</sup> /μl | 1.375 (0.812 - 2.330)        | 0.236        | 1.138 (0.847 - 1.531)        | 0.391        | 0.918 (0.610 - 1.381)        | 0.680         | 0.906 (0.606 - 1.355)        | 0.630         |
| ≥305 10 <sup>3</sup> /μl | 3.847 (0.859 - 17.218)       | 0.078        | 1.814 (0.880 - 3.742)        | 0.107        | <b>0.291 (0.121 - 0.701)</b> | <b>0.006</b>  | <b>0.322 (0.137 - 0.757)</b> | <b>0.009</b>  |
| PT * (801)               |                              |              |                              |              |                              |               |                              |               |
| >11.00 sec               | 1.197 (0.690 - 2.075)        | 0.523        | 1.157 (0.834 - 1.605)        | 0.382        | <b>0.577 (0.381 - 0.874)</b> | <b>0.009</b>  | <b>0.560 (0.371 - 0.844)</b> | <b>0.006</b>  |
| ≤11.00 sec               | 3.859 (0.627 - 23.766)       | 0.145        | 1.853 (0.851 - 4.037)        | 0.120        | 1.093 (0.365 - 3.280)        | 0.874         | 1.241 (0.426 - 3.614)        | 0.692         |
| aPTT * (801)             |                              |              |                              |              |                              |               |                              |               |
| >26.30 sec               | 1.678 (0.928 - 3.035)        | 0.087        | 1.233 (0.890 - 1.709)        | 0.207        | <b>0.585 (0.385 - 0.889)</b> | <b>0.012</b>  | <b>0.588 (0.389 - 0.890)</b> | <b>0.012</b>  |
| ≤26.30 sec               | 0.568 (0.164 - 1.973)        | 0.373        | 1.559 (0.698 - 3.481)        | 0.279        | 0.744 (0.238 - 2.320)        | 0.610         | 0.666 (0.223 - 1.988)        | 0.466         |
| Fibrinogen † (626)       |                              |              |                              |              |                              |               |                              |               |
| <537 mg/dl               | 1.685 (0.784 - 3.621)        | 0.181        | 1.334 (0.886 - 2.007)        | 0.167        | 0.692 (0.411 - 1.165)        | 0.166         | 0.720 (0.429 - 1.208)        | 0.213         |
| ≥537 mg/dl               | 0.948 (0.196 - 4.590)        | 0.947        | 1.280 (0.413 - 3.966)        | 0.669        | <b>0.176 (0.040 - 0.767)</b> | <b>0.021</b>  | <b>0.176 (0.040 - 0.767)</b> | <b>0.021</b>  |

Note: AOR, adjusted odds ratio; 95% CI, 95% confidence interval; HDL-c, high density lipoprotein cholesterol; PT, prothrombin time; aPTT, activated partial thromboplastin time; *NPRL3*, nitrogen permease receptor like-3. \* The adjusted odds ratio on the basis of risk factors, such as age, gender, hypertension, diabetes mellitus, hyperlipidemia, smoking. *P*-values <0.05 are bold. The number of each subgroup is located next to each subgroup.

† Folate 3.54nmol/L, PT 11.00 sec, and aPTT 26.30 sec were lower 15% cut-off each level in ischemic stroke patients and controls.

† Homocysteine 13.7 µmol/L, Platelet 305 103/µl, and fibrinogen 537 mg/dl were upper 15% cut-off each level in ischemic stroke patients and controls.

**Table S5.** Stratified analysis of *MPG* genotypes and characteristics of ischemic stroke among individual risk factors

| Characteristics          | <i>MPG</i> rs2562162         |              | <i>MPG</i> rs2562162         |              | <i>MPG</i> rs710079          |              | <i>MPG</i> rs710079          |              |
|--------------------------|------------------------------|--------------|------------------------------|--------------|------------------------------|--------------|------------------------------|--------------|
|                          | CT                           |              | CT+TT                        |              | CT                           |              | CT+TT                        |              |
|                          | AOR(95% CI)*                 | <i>P</i>     |
| Age (936)                |                              |              |                              |              |                              |              |                              |              |
| <63                      | 1.339 (0.876 - 2.045)        | 0.177        | 1.435 (0.952 - 2.164)        | 0.085        | 0.938 (0.592 - 1.486)        | 0.784        | 0.903 (0.573 - 1.424)        | 0.661        |
| ≥63                      | 1.255 (0.835 - 1.885)        | 0.275        | 1.157 (0.792 - 1.689)        | 0.451        | 0.950 (0.628 - 1.436)        | 0.808        | 0.915 (0.612 - 1.367)        | 0.664        |
| Sex (936)                |                              |              |                              |              |                              |              |                              |              |
| Male                     | 1.407 (0.899 - 2.203)        | 0.135        | 1.461 (0.953 - 2.239)        | 0.082        | 0.931 (0.575 - 1.508)        | 0.771        | 0.866 (0.540 - 1.388)        | 0.549        |
| Female                   | 1.229 (0.839 - 1.800)        | 0.289        | 1.168 (0.814 - 1.676)        | 0.399        | 0.924 (0.618 - 1.380)        | 0.698        | 0.914 (0.618 - 1.352)        | 0.652        |
| Hypertension (936)       |                              |              |                              |              |                              |              |                              |              |
| No                       | 1.357 (0.893 - 2.063)        | 0.153        | 1.415 (0.948 - 2.110)        | 0.089        | 1.201 (0.780 - 1.847)        | 0.406        | 1.093 (0.715 - 1.672)        | 0.680        |
| Yes                      | 1.191 (0.802 - 1.769)        | 0.387        | 1.127 (0.774 - 1.640)        | 0.534        | 0.779 (0.508 - 1.195)        | 0.252        | 0.798 (0.526 - 1.210)        | 0.288        |
| Diabetes mellitus (936)  |                              |              |                              |              |                              |              |                              |              |
| No                       | 1.188 (0.862 - 1.636)        | 0.293        | 1.184 (0.873 - 1.605)        | 0.277        | 0.859 (0.614 - 1.202)        | 0.376        | 0.829 (0.596 - 1.154)        | 0.266        |
| Yes                      | 1.875 (0.945 - 3.719)        | 0.072        | 1.830 (0.954 - 3.512)        | 0.069        | 1.728 (0.757 - 3.946)        | 0.194        | 1.570 (0.728 - 3.388)        | 0.250        |
| Hyperlipidemia (936)     |                              |              |                              |              |                              |              |                              |              |
| No                       | 1.373 (0.980 - 1.923)        | 0.065        | 1.340 (0.976 - 1.839)        | 0.071        | 0.863 (0.608 - 1.226)        | 0.412        | 0.821 (0.582 - 1.159)        | 0.262        |
| Yes                      | 1.108 (0.634 - 1.936)        | 0.719        | 1.113 (0.646 - 1.917)        | 0.700        | 1.321 (0.701 - 2.489)        | 0.390        | 1.309 (0.709 - 2.418)        | 0.389        |
| Smoking (930)            |                              |              |                              |              |                              |              |                              |              |
| No                       | 1.283 (0.896 - 1.838)        | 0.174        | 1.238 (0.880 - 1.741)        | 0.221        | 1.004 (0.683 - 1.477)        | 0.983        | 0.952 (0.654 - 1.387)        | 0.799        |
| Yes                      | 1.302 (0.800 - 2.119)        | 0.289        | 1.341 (0.845 - 2.126)        | 0.213        | 0.795 (0.477 - 1.327)        | 0.380        | 0.779 (0.469 - 1.292)        | 0.333        |
| HDL-c (671)              |                              |              |                              |              |                              |              |                              |              |
| ≥40(M)/50(F)             | 1.345 (0.790 - 2.289)        | 0.276        | 1.358 (0.819 - 2.253)        | 0.236        | 0.997 (0.562 - 1.769)        | 0.992        | 0.966 (0.547 - 1.706)        | 0.904        |
| <40(M)/50(F)             | 1.311 (0.763 - 2.252)        | 0.328        | 1.276 (0.765 - 2.127)        | 0.350        | <b>0.571 (0.334 - 0.976)</b> | <b>0.040</b> | <b>0.589 (0.347 - 0.999)</b> | <b>0.050</b> |
| Folate * (927)           |                              |              |                              |              |                              |              |                              |              |
| >3.54 nmol/L             | 1.277 (0.936 - 1.741)        | 0.123        | 1.235 (0.917 - 1.663)        | 0.165        | 1.026 (0.733 - 1.437)        | 0.879        | 0.969 (0.698 - 1.347)        | 0.852        |
| ≤3.54 nmol/L             | 1.391 (0.538 - 3.598)        | 0.496        | 1.555 (0.654 - 3.698)        | 0.318        | 0.635 (0.257 - 1.572)        | 0.326        | 0.714 (0.293 - 1.738)        | 0.458        |
| Homocysteine † (931)     |                              |              |                              |              |                              |              |                              |              |
| <13.7 µmol/L             | <b>1.438 (1.054 - 1.960)</b> | <b>0.022</b> | <b>1.455 (1.083 - 1.956)</b> | <b>0.013</b> | 0.909 (0.652 - 1.268)        | 0.573        | 0.864 (0.624 - 1.195)        | 0.377        |
| ≥13.7 µmol/L             | 0.536 (0.236 - 1.215)        | 0.135        | 0.496 (0.229 - 1.070)        | 0.075        | 1.347 (0.590 - 3.076)        | 0.480        | 1.407 (0.618 - 3.203)        | 0.415        |
| Platelet † (927)         |                              |              |                              |              |                              |              |                              |              |
| <305 10 <sup>3</sup> /µl | 1.159 (0.846 - 1.586)        | 0.358        | 1.140 (0.846 - 1.535)        | 0.390        | 1.032 (0.738 - 1.443)        | 0.854        | 0.996 (0.717 - 1.383)        | 0.980        |
| ≥305 10 <sup>3</sup> /µl | <b>2.137 (1.007 - 4.533)</b> | <b>0.048</b> | <b>2.278 (1.106 - 4.691)</b> | <b>0.026</b> | 0.691 (0.317 - 1.505)        | 0.352        | 0.654 (0.303 - 1.412)        | 0.279        |
| PT* (801)                |                              |              |                              |              |                              |              |                              |              |
| >11.00 sec               | 1.154 (0.815 - 1.635)        | 0.420        | 1.121 (0.808 - 1.555)        | 0.496        | 0.857 (0.598 - 1.229)        | 0.401        | 0.813 (0.571 - 1.158)        | 0.251        |
| ≤11.00 sec               | 1.976 (0.864 - 4.518)        | 0.106        | 1.798 (0.812 - 3.980)        | 0.148        | 1.349 (0.550 - 3.309)        | 0.513        | 1.349 (0.559 - 3.252)        | 0.506        |
| aPTT* (801)              |                              |              |                              |              |                              |              |                              |              |
| >26.30 sec               | 1.125 (0.798 - 1.587)        | 0.502        | 1.121 (0.809 - 1.555)        | 0.493        | 0.908 (0.630 - 1.307)        | 0.602        | 0.857 (0.599 - 1.224)        | 0.396        |
| ≤26.30 sec               | 2.228 (0.916 - 5.417)        | 0.077        | 1.662 (0.731 - 3.775)        | 0.225        | 0.998 (0.424 - 2.348)        | 0.996        | 0.969 (0.419 - 2.239)        | 0.941        |
| Fibrinogen † (626)       |                              |              |                              |              |                              |              |                              |              |
| < 537 mg/dl              | 1.552 (0.999 - 2.413)        | 0.051        | <b>1.598 (1.050 - 2.433)</b> | <b>0.029</b> | 0.839 (0.535 - 1.314)        | 0.443        | 0.834 (0.535 - 1.298)        | 0.421        |
| ≥ 537 mg/dl              | 1.314 (0.408 - 4.232)        | 0.647        | 1.259 (0.419 - 3.778)        | 0.682        | 0.601 (0.190 - 1.901)        | 0.386        | 0.601 (0.190 - 1.901)        | 0.386        |

Note: AOR, adjusted odds ratio; 95% CI, 95% confidence interval; HDL-c, high density lipoprotein cholesterol; PT, prothrombin time; aPTT, activated partial thromboplastin time; *MPG*, N-methylpurine DNA glycosylase. \* The adjusted odds ratio on the basis of risk factors, such as age, gender, hypertension, diabetes mellitus, hyperlipidemia, smoking. *P*-values <0.05 are bold. The number of each subgroup is located next to each subgroup.

---

<sup>†</sup> Folate 3.54nmol/L, PT 11.00 sec, and aPTT 26.30 sec were lower 15% cut-off each level in ischemic stroke patients and controls.

<sup>‡</sup> Homocysteine 13.7 μmol/L, Platelet 305 103/μℓ, and fibrinogen 537 mg/dl were upper 15% cut-off each level in ischemic stroke patients and controls.

**Table S6.** Ischemic stroke incidence by interaction analysis between *NPRL3*, *MPG* genotypes and environmental factors

| Characteristics          | <i>NPRL3</i> rs2541618<br>CC | <i>NPRL3</i> rs2541618<br>CT+TT | <i>NPRL3</i> rs75187722<br>GG | <i>NPRL3</i> rs75187722<br>GA+AA | <i>MPG</i> rs2562162<br>CC   | <i>MPG</i> rs2562162<br>CT+TT | <i>MPG</i> rs710079<br>CC    | <i>MPG</i> rs710079<br>CT+TT |
|--------------------------|------------------------------|---------------------------------|-------------------------------|----------------------------------|------------------------------|-------------------------------|------------------------------|------------------------------|
| HDL-c (671)              |                              |                                 |                               |                                  |                              |                               |                              |                              |
| ≥40(M)/50(F)             | 1.000 (reference)            | 1.089 (0.758 - 1.565)           | 1.000 (reference)             | <b>0.508 (0.297 - 0.870)</b>     | 1.000 (reference)            | <b>1.449 (1.007 - 2.085)</b>  | 1.000 (reference)            | 1.078 (0.718 - 1.619)        |
| <40(M)/50(F)             | <b>4.529 (2.900 - 7.074)</b> | <b>6.364 (4.103 - 9.869)</b>    | <b>5.541 (3.880 - 7.912)</b>  | <b>3.699 (2.099 - 6.520)</b>     | <b>5.718 (3.754 - 8.709)</b> | <b>7.330 (4.564 - 11.773)</b> | <b>6.449 (4.384 - 9.487)</b> | <b>3.929 (2.412 - 6.400)</b> |
| Folate * (927)           |                              |                                 |                               |                                  |                              |                               |                              |                              |
| >3.54 nmol/L             | 1.000 (reference)            | 1.187 (0.883 - 1.596)           | 1.000 (reference)             | 0.911 (0.619 - 1.340)            | 1.000 (reference)            | 1.254 (0.932 - 1.686)         | 1.000 (reference)            | 0.953 (0.687 - 1.322)        |
| ≤3.54 nmol/L             | <b>3.235 (1.739 - 6.019)</b> | <b>4.866 (2.527 - 9.370)</b>    | <b>5.427 (3.151 - 9.347)</b>  | 0.696 (0.282 - 1.717)            | <b>3.347 (1.892 - 5.919)</b> | <b>5.601 (2.651 - 11.836)</b> | <b>3.925 (2.270 - 6.785)</b> | <b>2.622 (1.247 - 5.517)</b> |
| Homocysteine † (931)     |                              |                                 |                               |                                  |                              |                               |                              |                              |
| <13.7 μmol/L             | 1.000 (reference)            | 1.261 (0.940 - 1.691)           | 1.000 (reference)             | 0.738 (0.499 - 1.092)            | 1.000 (reference)            | <b>1.463 (1.088 - 1.965)</b>  | 1.000 (reference)            | 0.860 (0.621 - 1.190)        |
| ≥13.7 μmol/L             | 1.727 (0.976 - 3.056)        | <b>1.839 (1.057 - 3.201)</b>    | <b>1.639 (1.041 - 2.581)</b>  | 0.857 (0.391 - 1.875)            | <b>2.365 (1.374 - 4.071)</b> | 1.301 (0.731 - 2.318)         | 1.281 (0.797 - 2.059)        | 1.747 (0.882 - 3.462)        |
| Platelet † (927)         |                              |                                 |                               |                                  |                              |                               |                              |                              |
| <305 10 <sup>3</sup> /μℓ | 1.000 (reference)            | 1.140 (0.849 - 1.530)           | 1.000 (reference)             | 0.870 (0.585 - 1.296)            | 1.000 (reference)            | 1.158 (0.861 - 1.557)         | 1.000 (reference)            | 0.991 (0.716 - 1.373)        |
| ≥305 10 <sup>3</sup> /μℓ | 0.670 (0.379 - 1.187)        | 1.205 (0.711 - 2.042)           | 1.170 (0.749 - 1.829)         | <b>0.356 (0.163 - 0.776)</b>     | 0.658 (0.385 - 1.123)        | 1.348 (0.770 - 2.357)         | 1.033 (0.650 - 1.643)        | 0.662 (0.342 - 1.281)        |
| PT* (801)                |                              |                                 |                               |                                  |                              |                               |                              |                              |
| >11.00 sec               | 1.000 (reference)            | 1.113 (0.831 - 1.491)           | 1.000 (reference)             | <b>0.666 (0.454 - 0.976)</b>     | 1.000 (reference)            | 1.182 (0.882 - 1.585)         | 1.000 (reference)            | 0.900 (0.653 - 1.240)        |
| ≤11.00 sec               | 1.067 (0.606 - 1.881)        | <b>2.192 (1.241 - 3.872)</b>    | 1.319 (0.855 - 2.035)         | 1.579 (0.608 - 4.099)            | 1.201 (0.690 - 2.088)        | <b>2.071 (1.164 - 3.682)</b>  | 1.364 (0.858 - 2.170)        | 1.564 (0.744 - 3.290)        |
| aPTT* (801)              |                              |                                 |                               |                                  |                              |                               |                              |                              |
| >26.30 sec               | 1.000 (reference)            | 1.176 (0.879 - 1.573)           | 1.000 (reference)             | <b>0.679 (0.463 - 0.996)</b>     | 1.000 (reference)            | 1.215 (0.907 - 1.627)         | 1.000 (reference)            | 0.910 (0.660 - 1.257)        |
| ≤26.30 sec               | 1.190 (0.668 - 2.121)        | 1.731 (0.971 - 3.086)           | 1.273 (0.812 - 1.996)         | 1.255 (0.489 - 3.222)            | 1.210 (0.696 - 2.105)        | 1.832 (0.996 - 3.372)         | 1.312 (0.801 - 2.149)        | 1.292 (0.648 - 2.579)        |
| Fibrinogen † (626)       |                              |                                 |                               |                                  |                              |                               |                              |                              |
| < 537 mg/dl              | 1.000 (reference)            | 1.204 (0.904 - 1.603)           | 1.000 (reference)             | 0.804 (0.553 - 1.168)            | 1.000 (reference)            | 1.272 (0.954 - 1.696)         | 1.000 (reference)            | 0.982 (0.717 - 1.346)        |
| ≥ 537 mg/dl              | <b>2.690 (1.276 - 5.670)</b> | <b>3.464 (1.698 - 7.065)</b>    | <b>3.535 (1.972 - 6.335)</b>  | 0.702 (0.223 - 2.209)            | <b>2.926 (1.483 - 5.770)</b> | <b>3.460 (1.580 - 7.578)</b>  | <b>3.481 (1.838 - 6.595)</b> | 1.716 (0.727 - 4.049)        |

Note: *NPRL3*, nitrogen permease receptor like-3; *MPG*, N-methylpurine DNA glycosylase; PT, prothrombin time; aPTT, activated partial thromboplastin time. *P*-values <0.05 are bold. The number of each subgroup is located next to each subgroup.

\* Folate 3.54nmol/L, PT 11.00 sec, and aPTT 26.30 sec were lower 15% cut-off each level in ischemic stroke patients and controls.

† Homocysteine 13.7 umol/L, Platelet 305 10<sup>3</sup>/μℓ, and Fibrinogen 537 mg/dl were upper 15% cut-off each level in ischemic stroke patients and controls.

**Table S7.** Clinical variables of ischemic stroke patients and subtypes stratified according to *NPRL3* and *MPG* polymorphisms

| Genotypes                  | PLT<br>(10 <sup>3</sup> /μL) |              | Uric acid<br>(mg/dL) |                    | LAD patients<br>Platelets<br>(10 <sup>3</sup> /μL) |                           | LAD patients<br>Uric acid<br>(mg/dL) |                           | LAD patients<br>HDL-c<br>(mg/dL) |                    | SVD patients<br>Fibrinogen<br>(mg/dL) |              |
|----------------------------|------------------------------|--------------|----------------------|--------------------|----------------------------------------------------|---------------------------|--------------------------------------|---------------------------|----------------------------------|--------------------|---------------------------------------|--------------|
|                            | Mean±SD                      | <i>P</i> *   | Mean±SD              | <i>P</i> *         | Mean±SD                                            | <i>P</i> *                | Mean±SD                              | <i>P</i> *                | Mean±SD                          | <i>P</i> *         | Mean±SD                               | <i>P</i> *   |
| <i>NPRL3</i> rs2541618C>T  |                              |              |                      |                    |                                                    |                           |                                      |                           |                                  |                    |                                       |              |
| CC                         | 238.37±81.92                 | 0.256        | 4.58±1.50            | 0.455              | 245.99±100.50                                      | 0.682                     | 4.46±1.39                            | 0.157                     | 45.68±16.13                      | 0.110              | 393.32±112.43                         | 0.103        |
| CT                         | 249.98±71.92                 |              | 4.76±1.57            |                    | 255.96±66.07                                       |                           | 4.83±1.50                            |                           | 41.52±10.56                      |                    | 387.55±113.65                         |              |
| TT                         | 247.66±75.39                 |              | 4.90±1.35            |                    | 257.40±75.36                                       |                           | 4.87±1.18                            |                           | 42.55±8.42                       |                    | 450.26±120.70                         |              |
| Dominant (CC vs CT+TT)     | 249.54±72.47                 | 0.101        | 4.79±1.53            | 0.114              | 256.27±67.87                                       | <b>0.030</b> <sup>†</sup> | 4.84±1.43                            | 0.055                     | 41.76±10.08                      | <b>0.038</b>       | 401.57±117.51                         | 0.684        |
| Recessive (CC+CT vs TT)    | 247.66±75.39                 | 0.761        | 4.90±1.35            | 0.282              | 257.40±75.36                                       | 0.646 <sup>†</sup>        | 4.87±1.18                            | 0.444                     | 42.55±8.42                       | 0.696              | 450.26±120.70                         | <b>0.034</b> |
| <i>NPRL3</i> rs75187722G>A |                              |              |                      |                    |                                                    |                           |                                      |                           |                                  |                    |                                       |              |
| GG                         | 245.19±78.12                 | 0.916        | 4.70±1.49            | <b>0.028</b>       | 253.51±83.97                                       | 0.423                     | 4.76±1.46                            | <b>0.023</b> <sup>†</sup> | 43.31±10.28                      | 0.364 <sup>†</sup> | 397.16±118.19                         | 0.922        |
| GA                         | 241.61±70.88                 |              | 4.58±1.58            |                    | 239.79±85.13                                       |                           | 4.08±0.94                            |                           | 44.98±26.14                      |                    | 407.14±93.19                          |              |
| AA                         | 251.75±50.07                 |              | 6.65±2.67            |                    | -                                                  |                           | -                                    |                           | -                                |                    | 429.00±0.00                           |              |
| Dominant (GG vs GA+AA)     | 242.11±69.79                 | 0.741        | 4.68±1.68            | 0.927              | 239.79±85.13                                       | 0.152 <sup>†</sup>        | 4.08±0.94                            | <b>0.023</b> <sup>†</sup> | 44.98±26.14                      | 0.364 <sup>†</sup> | 408.60±89.98                          | 0.718        |
| Recessive (GG+GA vs AA)    | 251.75±50.07                 | 0.854        | 6.65±2.67            | 0.098 <sup>†</sup> | -                                                  |                           | -                                    |                           | -                                |                    | 429.00±0.00                           | 0.791        |
| <i>MPG</i> rs2562162C>T    |                              |              |                      |                    |                                                    |                           |                                      |                           |                                  |                    |                                       |              |
| CC                         | 237.17±76.06                 | 0.071        | 4.74±1.50            | 0.710              | 242.25±91.32                                       | 0.247                     | 4.60±1.28                            | 0.586                     | 43.49±15.36                      | 0.858              | 391.96±110.84                         | 0.702        |
| CT                         | 253.07±75.91                 |              | 4.63±1.53            |                    | 260.11±72.14                                       |                           | 4.78±1.61                            |                           | 43.24±11.10                      |                    | 406.78±120.93                         |              |
| TT                         | 249.89±84.18                 |              | 4.76±1.54            |                    | 269.00±94.22                                       |                           | 4.48±1.24                            |                           | 45.37±8.72                       |                    | 383.83±110.54                         |              |
| Dominant (CC vs CT+TT)     | 252.61±76.97                 | <b>0.022</b> | 4.65±1.53            | 0.499              | 261.33±75.07                                       | 0.103                     | 4.74±1.56                            | 0.875 <sup>†</sup>        | 43.55±10.78                      | 0.977              | 403.50±119.08                         | 0.561        |
| Recessive (CC+CT vs TT)    | 249.89±84.18                 | 0.675        | 4.76±1.54            | 0.789              | 269.00±94.22                                       | 0.425                     | 4.48±1.24                            | 0.607                     | 45.37±8.72                       | 0.589              | 383.83±110.54                         | 0.664        |
| <i>MPG</i> rs710079C>T     |                              |              |                      |                    |                                                    |                           |                                      |                           |                                  |                    |                                       |              |
| CC                         | 245.56±78.74                 | 0.629        | 4.69±1.48            | 0.937              | 254.09±86.26                                       | 0.316                     | 4.74±1.50                            | 0.342                     | 43.06±10.48                      | 0.406              | 395.93±118.45                         | 0.874        |
| CT                         | 243.76±72.65                 |              | 4.71±1.62            |                    | 247.13±77.30                                       |                           | 4.49±1.17                            |                           | 45.11±19.31                      |                    | 406.91±105.49                         |              |
| TT                         | 217.71±46.82                 |              | 4.87±1.54            |                    | 132.00±0.00                                        |                           | 3.30±0.00                            |                           | 30.80±0.00                       |                    | 429.00±0.00                           |              |
| Dominant (CC vs CT+TT)     | 242.47±71.71                 | 0.684        | 4.72±1.62            | 0.809              | 245.07±78.12                                       | 0.595 <sup>†</sup>        | 4.47±1.17                            | 0.227                     | 44.83±19.22                      | 0.413              | 407.67±103.67                         | 0.628        |
| Recessive (CC+CT vs TT)    | 217.71±46.82                 | 0.350        | 4.87±1.54            | 0.758              | 132.00±0.00                                        | 0.090 <sup>†</sup>        | 3.30±0.00                            | 0.336                     | 30.80±0.00                       | 0.337              | 429.00±0.00                           | 0.791        |

Note: ANOVA, analysis of variance; HDL-c, high density lipoprotein cholesterol; LAD, large artery disease; SVD, small vessel disease; CE, cardioembolism; SD, standard deviation;

*NPRL3*, nitrogen permease receptor like-3; *MPG*, N-methylpurine DNA glycosylase.

\*Calculated using ANOVA. <sup>†</sup>Calculated using the Kruskal-Wallis test. *P*-values< 0,05 are bold



**Table S8.** Results of stepwise Cox regression analysis for ischemic stroke survival

| Covariate                                                       | $\beta$ | SEM   | HR (95% CI)           | <i>P</i> *        |
|-----------------------------------------------------------------|---------|-------|-----------------------|-------------------|
| <i>MPG</i> rs2562162 CC vs CT in SVD group                      |         |       |                       |                   |
| Age                                                             | 0.078   | 0.026 | 1.081 (1.028 - 1.137) | <b>0.003</b>      |
| <i>MPG</i> rs2562162 CC vs CT+TT in SVD group                   |         |       |                       |                   |
| Age                                                             | 0.078   | 0.024 | 1.082 (1.032 - 1.133) | <b>0.001</b>      |
| <i>MPG</i> rs2562162 CC vs CT+TT in SVD group/with hypertension |         |       |                       |                   |
| Genetic variant (CC vs CT+TT)                                   | 1.686   | 0.810 | 0.185 (0.038 - 0.899) | <b>0.037</b>      |
| Age                                                             | 0.100   | 0.035 | 1.105 (1.032 - 1.183) | <b>0.001</b>      |
| <i>MPG</i> rs710079 CC vs CT with diabetes mellitus             |         |       |                       |                   |
| Genetic variant (CC vs CT)                                      | 0.788   | 0.381 | 2.200 (1.046 - 4.625) | <b>0.039</b>      |
| Age                                                             | 0.052   | 0.019 | 1.054 (1.016 - 1.093) | <b>0.005</b>      |
| <i>NPRL3</i> rs2541618 CC vs CT+TT with hyperlipidemia          |         |       |                       |                   |
| Genetic variant (CC vs CT+TT)                                   | 1.134   | 0.556 | 3.107 (1.051 - 9.183) | <b>0.041</b>      |
| Age                                                             | 0.076   | 0.019 | 1.079 (1.040 - 1.120) | <b>&lt;0.001</b>  |
| <i>MPG</i> rs710079 CC vs CT in male                            |         |       |                       |                   |
| Genetic variant (CC vs CT)                                      | 0.825   | 0.370 | 2.282 (1.109 - 4.696) | <b>0.026</b>      |
| Age                                                             | 0.075   | 0.015 | 1.078 (1.047 - 1.109) | <b>&lt;0.0001</b> |

Note: SEM, standard error of the mean; HR, hazard ratio; CI, confidence interval; NPRL3, nitrogen permease receptor like-3; MPG, N-methylpurine DNA glycosylase; SVD, small vessel disease.

\**P*-value calculated by Cox proportional-hazards regression based on stepwise method. *P*-values< 0,05 are bold

**Table S9.** Statistical power to detect various genetic associations in the present case-control study

| Characteristics                        | Table         | AOR (95% CI)          | Statistical power (%) |
|----------------------------------------|---------------|-----------------------|-----------------------|
| <i>NPRL3</i> rs75187722 Dominant model | Table 2 (LAD) | 0.599 (0.370 - 0.968) | 51.44                 |
| <i>NPRL3</i> rs2541618TT               | Table 2 (SVD) | 2.406 (1.225 - 4.725) | 54.13                 |
| <i>NPRL3</i> rs2541618 Dominant model  | Table 2 (SVD) | 1.524 (1.019 - 2.279) | 61.58                 |
| <i>NPRL3</i> rs75187722GA              | Table 2 (SVD) | 0.474 (0.261 - 0.860) | 53.77                 |
| <i>NPRL3</i> rs75187722 Dominant model | Table 2 (SVD) | 0.495 (0.277 - 0.886) | 50.62                 |
| <i>MPG</i> rs2562162CT                 | Table 2 (SVD) | 1.569 (1.038 - 2.372) | 78.95                 |
| <i>MPG</i> rs2562162 Dominant model    | Table 2 (SVD) | 1.589 (1.069 - 2.363) | 80.70                 |

Note: AOR, adjust odds ratio; 95% CI, 95% confidence interval.

**Table S10.** The results of meta-analysis restricted to Europeans in the MEGASTROKE GWAS loci of *NPRL3* and *MPG* genes polymorphisms

| SNP        | Chr | Gene  | Ischemic stroke patients & controls |       |        |        |                 | LAD patients & controls |        |        |                 | SVD patients & controls |        |        |                 | CE patients & controls |        |        |                 |
|------------|-----|-------|-------------------------------------|-------|--------|--------|-----------------|-------------------------|--------|--------|-----------------|-------------------------|--------|--------|-----------------|------------------------|--------|--------|-----------------|
|            |     |       | Risk allele                         | MAF   | Effect | StdErr | <i>P</i> -value | MAF                     | Effect | StdErr | <i>P</i> -value | MAF                     | Effect | StdErr | <i>P</i> -value | MAF                    | Effect | StdErr | <i>P</i> -value |
| rs2541618  | 16  | NPRL3 | T                                   | 0.142 | 0.019  | 0.015  | 0.203           | 0.146                   | 0.007  | 0.038  | 0.855           | 0.141                   | 0.078  | 0.035  | <b>0.024</b>    | 0.144                  | 0.025  | 0.029  | 0.400           |
| rs75187722 | 16  | NPRL3 | A                                   | 0.016 | -0.069 | 0.057  | 0.222           | 0.015                   | -0.097 | 0.158  | 0.537           | 0.016                   | 0.133  | 0.142  | 0.350           | 0.017                  | -0.123 | 0.109  | 0.257           |
| rs2562162  | 16  | MPG   | T                                   | 0.134 | 0.033  | 0.019  | 0.080           | 0.137                   | 0.078  | 0.047  | 0.093           | 0.133                   | 0.084  | 0.042  | <b>0.045</b>    | 0.136                  | 0.041  | 0.037  | 0.271           |
| rs710079   | 16  | MPG   | T                                   | 0.017 | 0.035  | 0.052  | 0.509           | 0.018                   | 0.016  | 0.141  | 0.913           | 0.017                   | 0.101  | 0.121  | 0.407           | 0.018                  | 0.031  | 0.103  | 0.764           |

Note: GWAS, genome-wide association study; SNP, single nucleotide polymorphism; Chr, chromosome; MAF, minor allele frequency; StdErr, standard error; NPRL3, nitrogen permease receptor like-3; MPG, N-methylpurine DNA glycosylase; LAD, large artery disease; SVD, small vessel disease; CE, cardioembolism. *P*-values< 0,05 are bold
